# Supplementary material for: Unified Synthesis and Biological Evaluation of Makaluvamine J and Its Analogs
Source: MDPI journal article supplement (doi:10.3390/molecules29061389), 2024-03-20

## **Supporting Information**

### **Unified Synthesis and Biological Evaluation of Makaluvamine J and its Analogues**

Yo Kiichi, Koshiro Fukuoka, Anna Kitano, Koya Ishino, Naoyuki Kotoku\*

College of Pharmaceutical Sciences, Ritsumeikan University, 1-1-1 Noji-higashi, Kusatsu, Shiga, 525-8577, Japan

#### **Contents**

$^1\text{H}$ - and  $^{13}\text{C}$ -NMR spectra for new compounds: pages S2-S11

<sup>1</sup>H NMR (500 MHz, CDCl<sub>3</sub>)

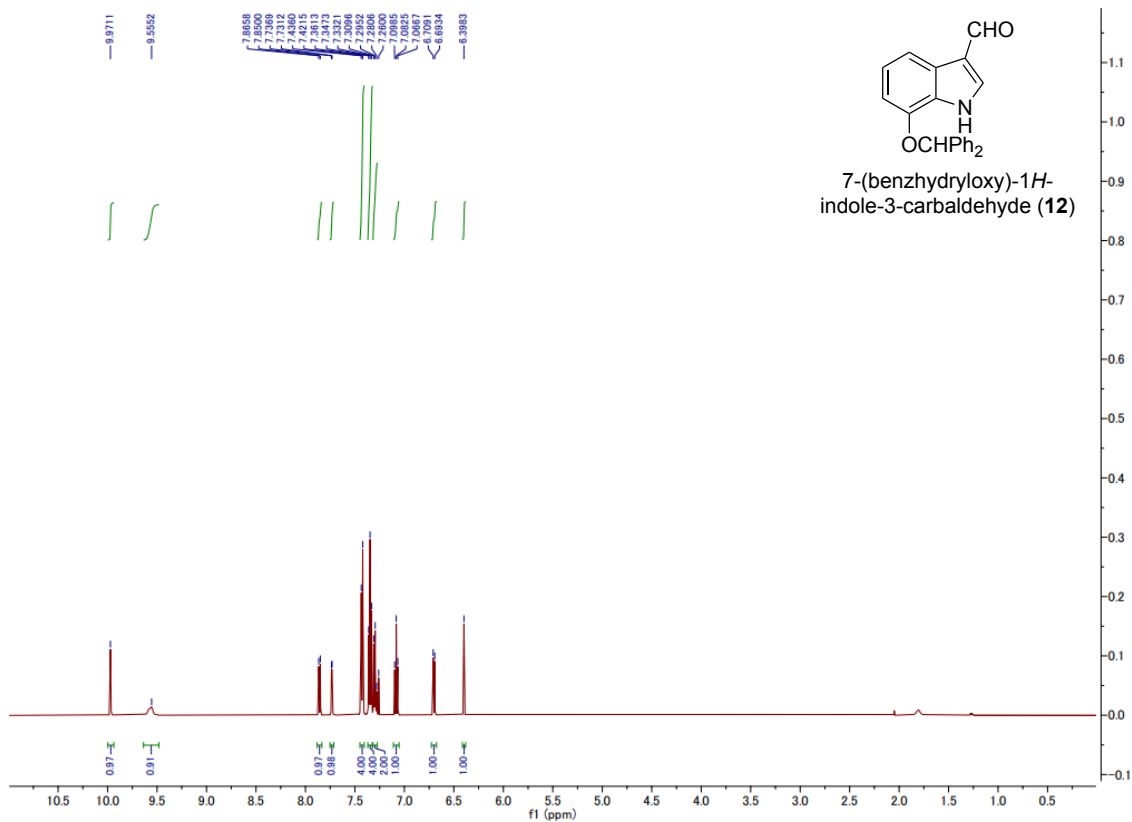

<sup>13</sup>C NMR (125 MHz, CDCl<sub>3</sub>)

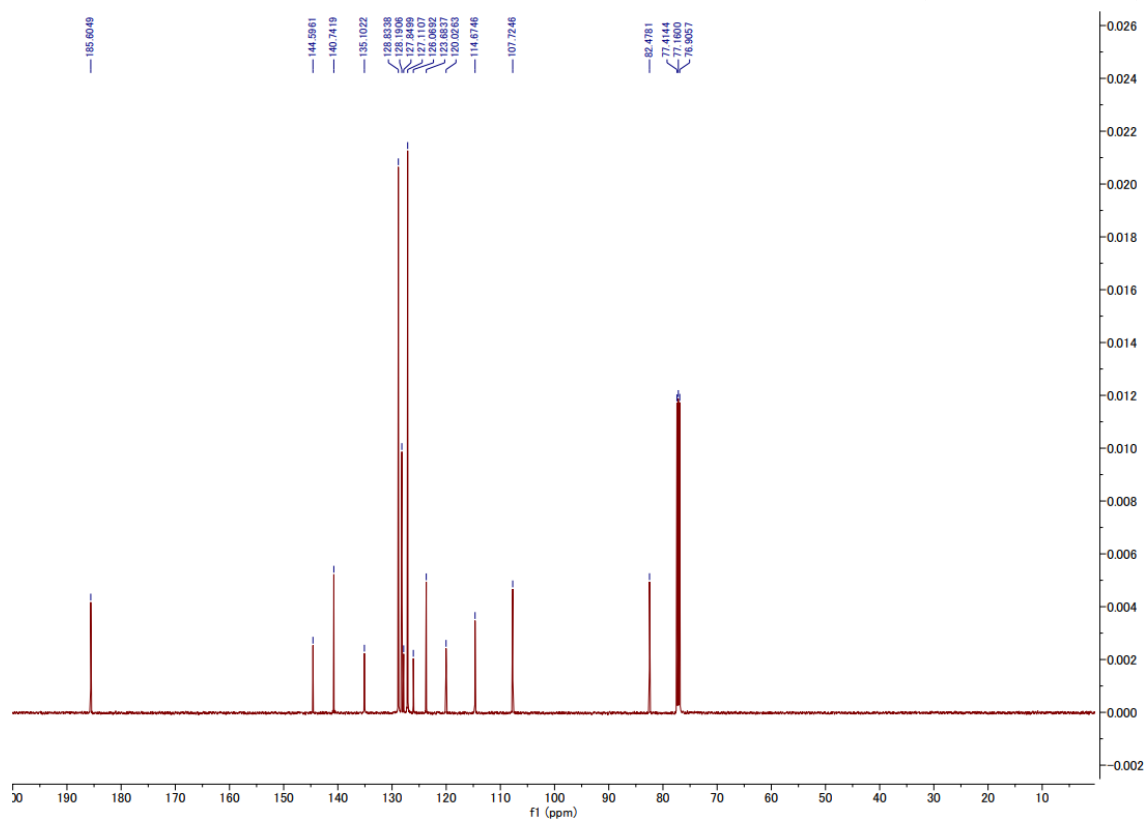

<sup>1</sup>H NMR (500 MHz, (CD<sub>3</sub>)<sub>2</sub>CO)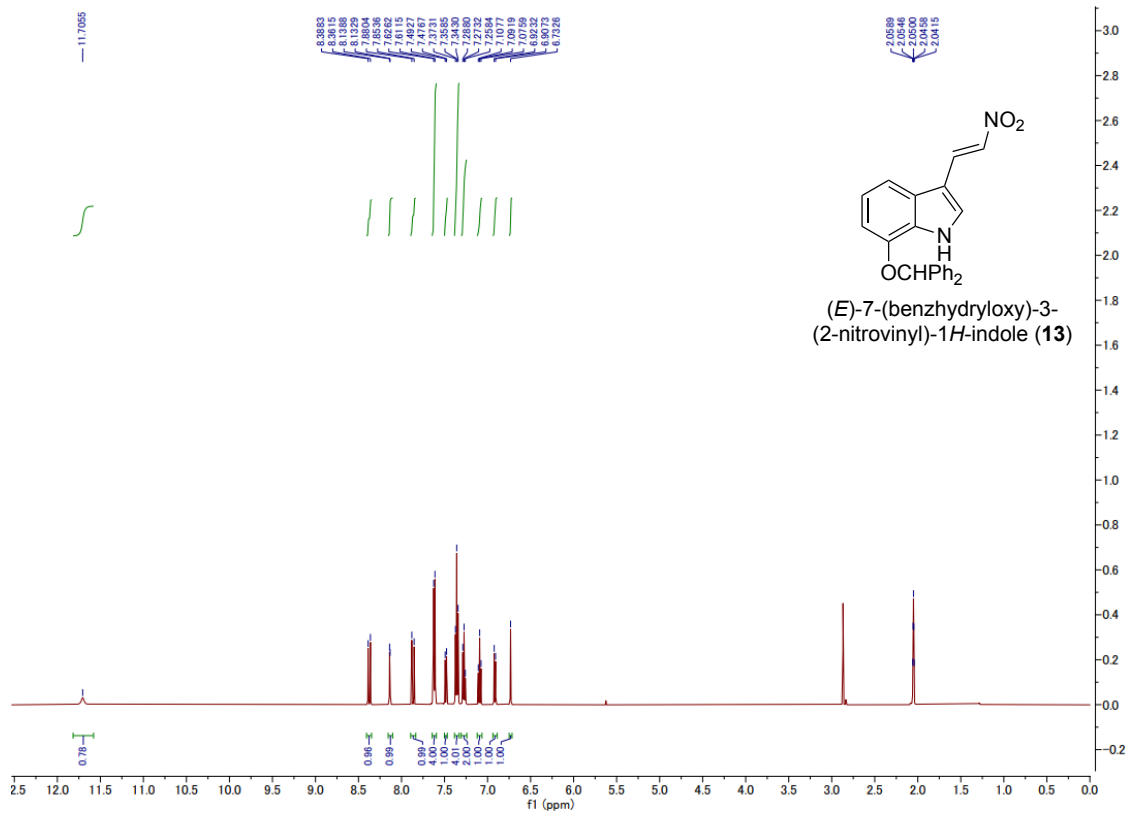 $^{13}\text{C}$  NMR (125 MHz,  $(\text{CD}_3)_2\text{CO}$ )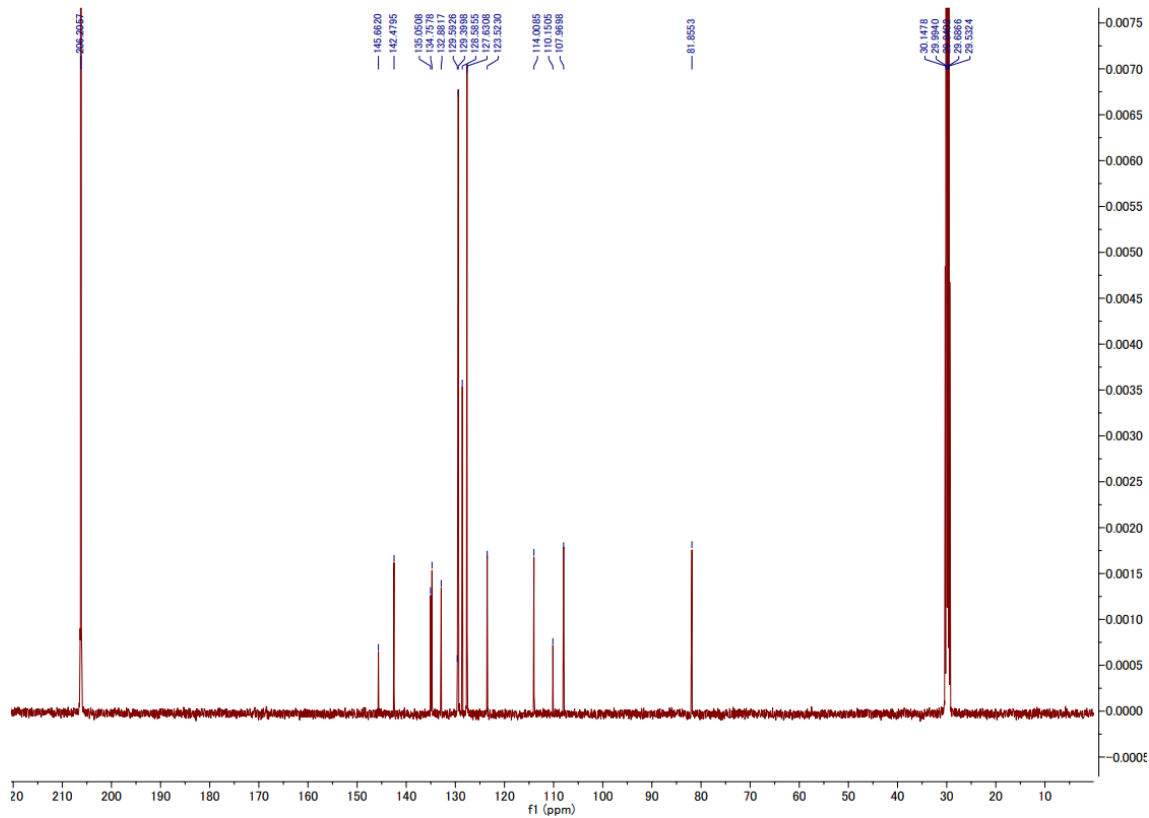

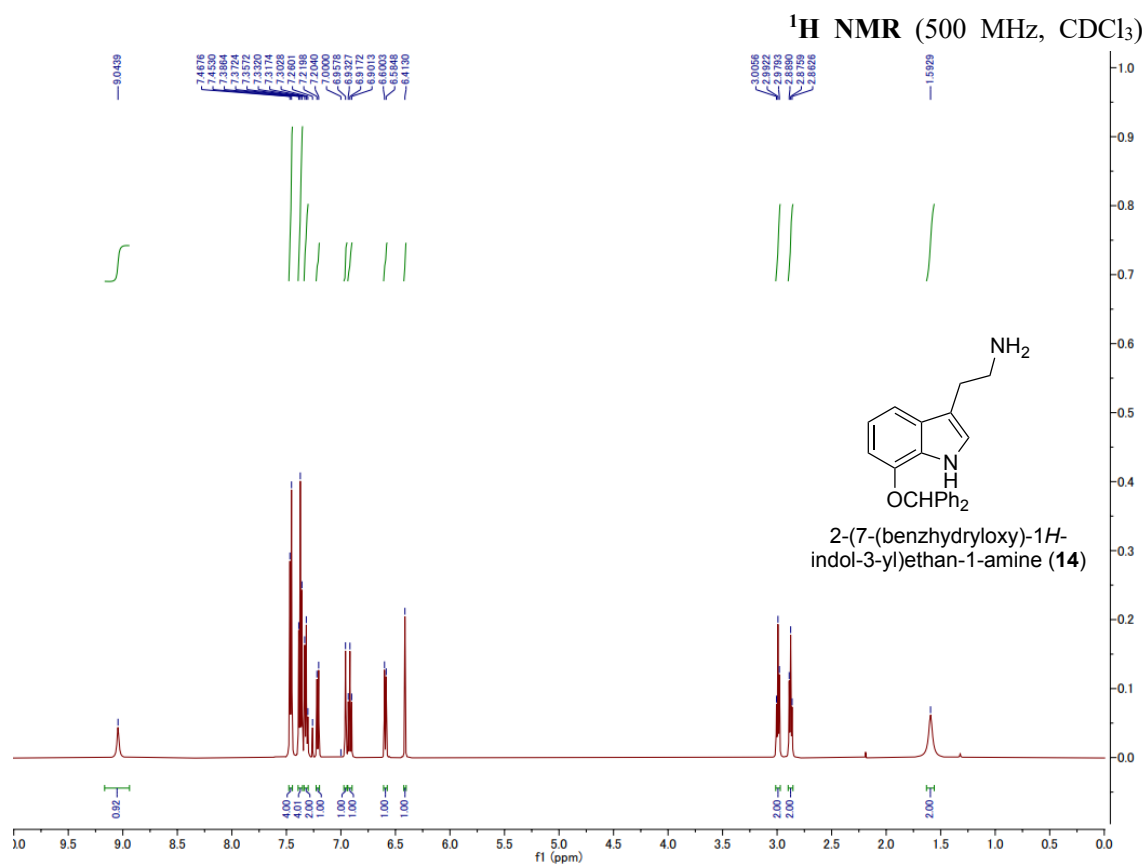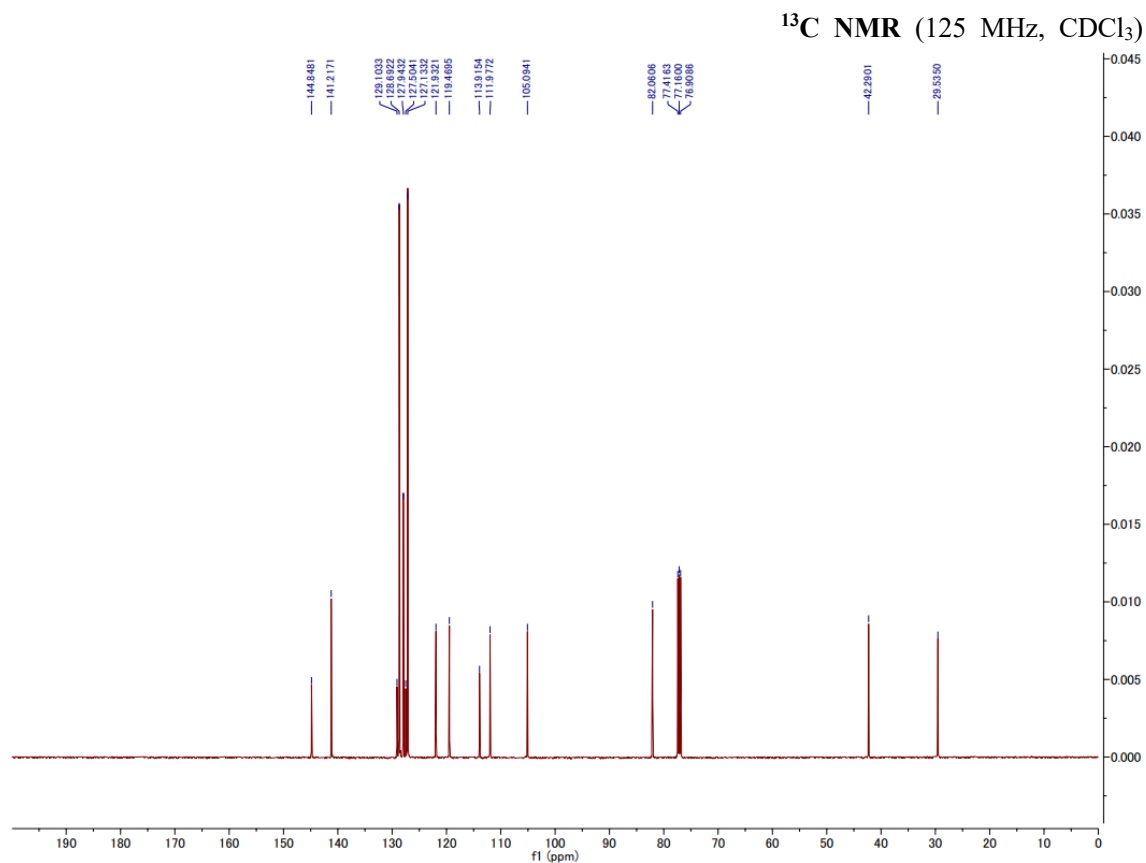

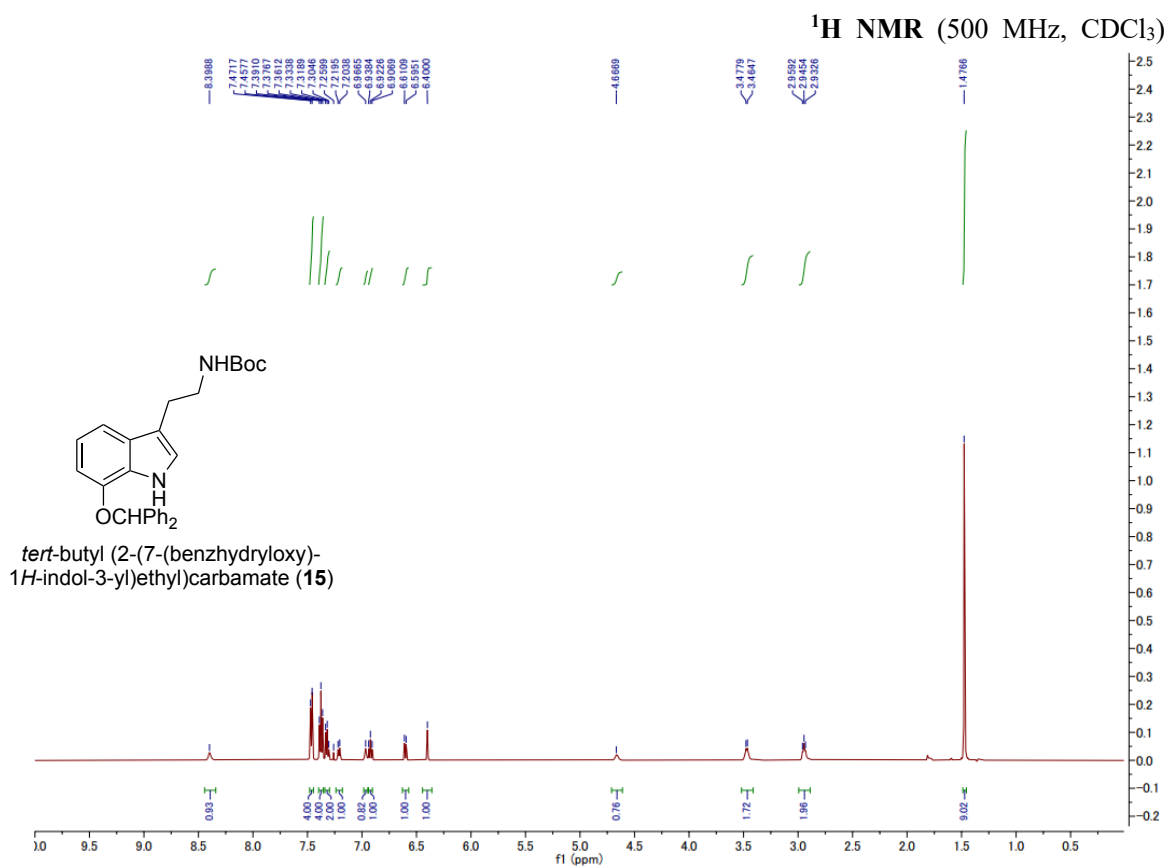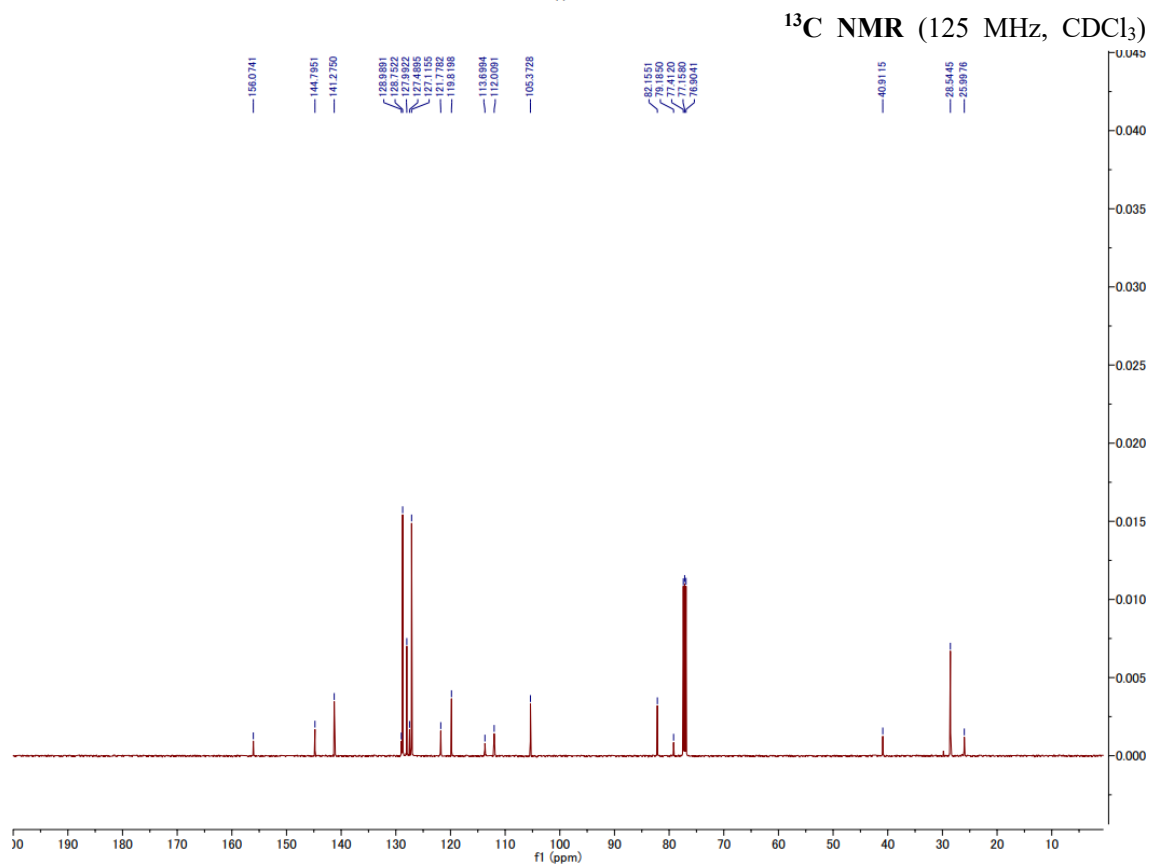

<sup>1</sup>H NMR (500 MHz, CD<sub>3</sub>OD)

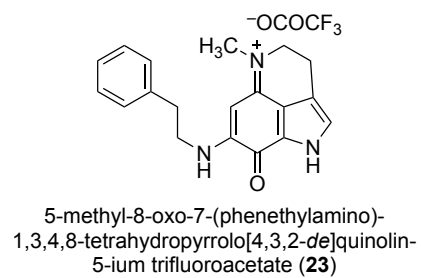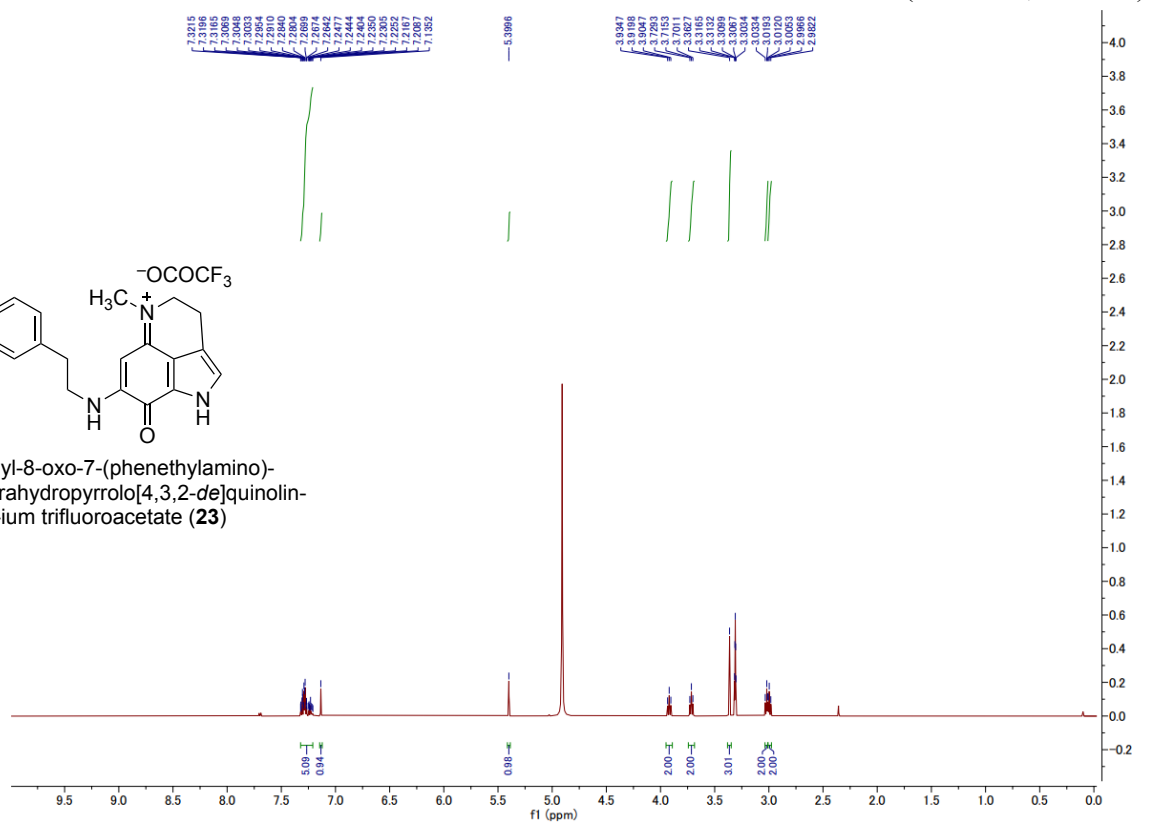

<sup>13</sup>C NMR (125 MHz, CD<sub>3</sub>OD)

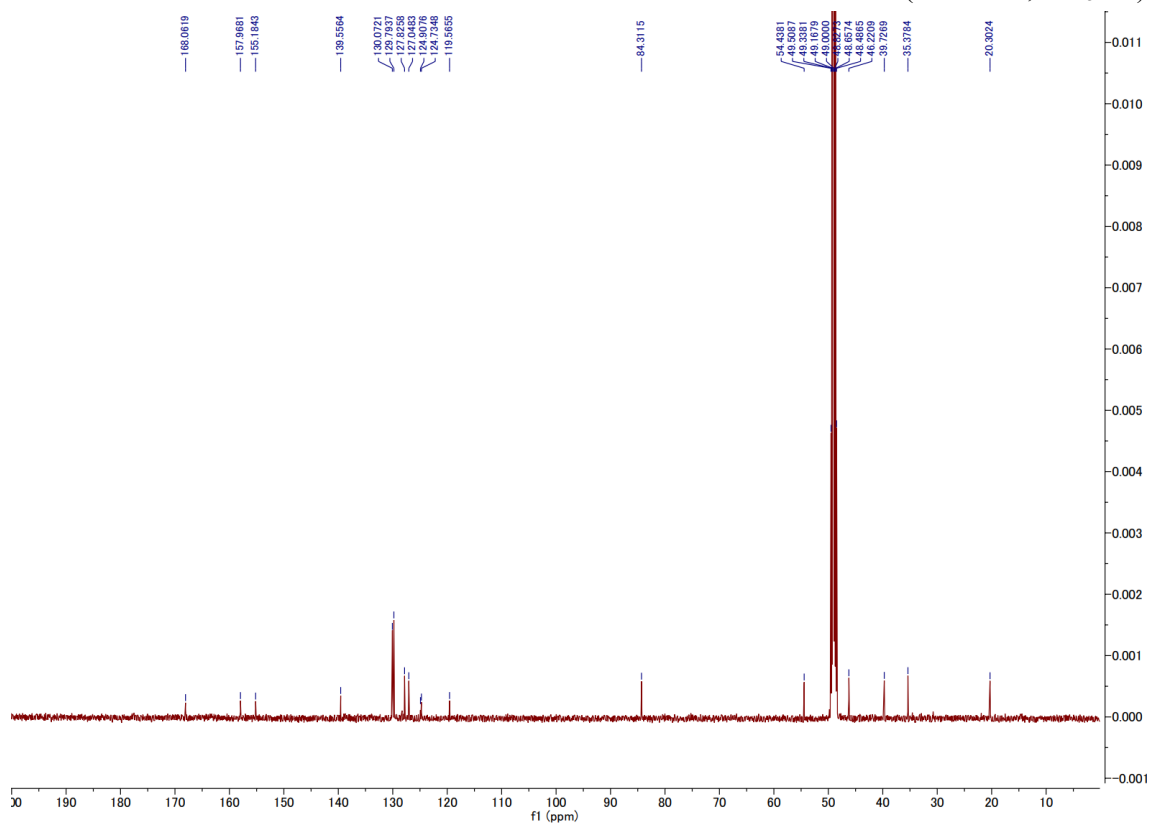

<sup>1</sup>H NMR (500 MHz, CD<sub>3</sub>OD)

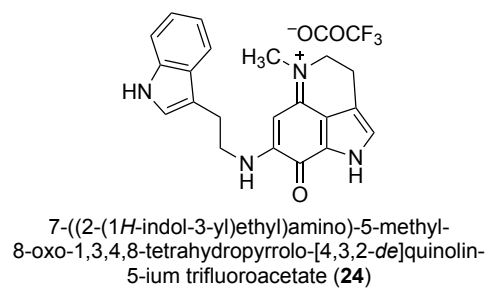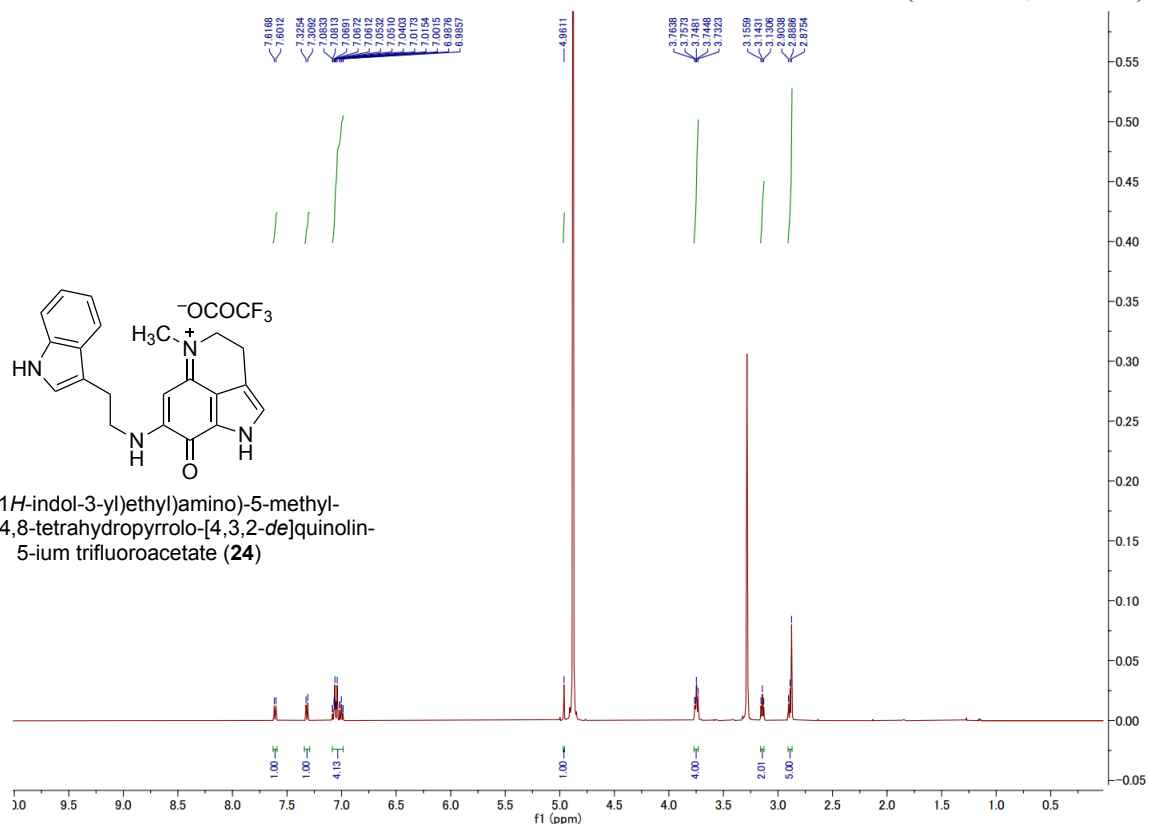

<sup>13</sup>C NMR (125 MHz, CD<sub>3</sub>OD)

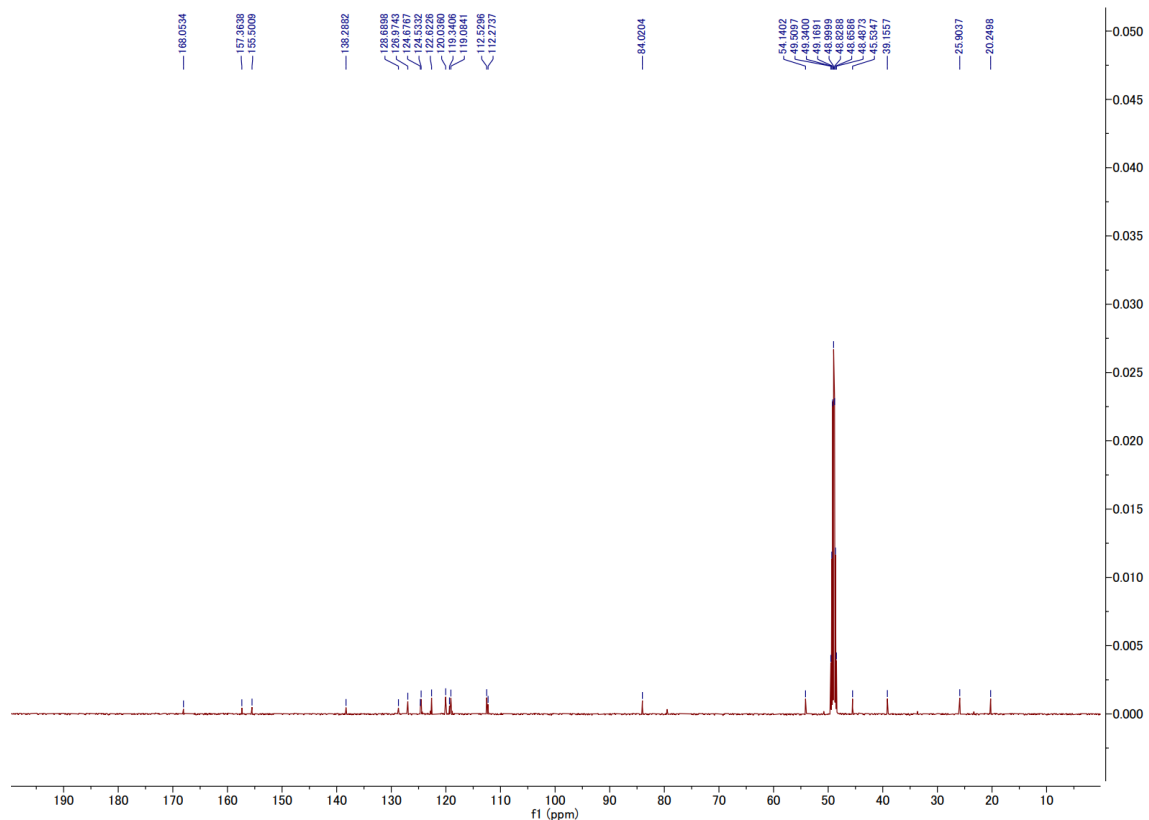

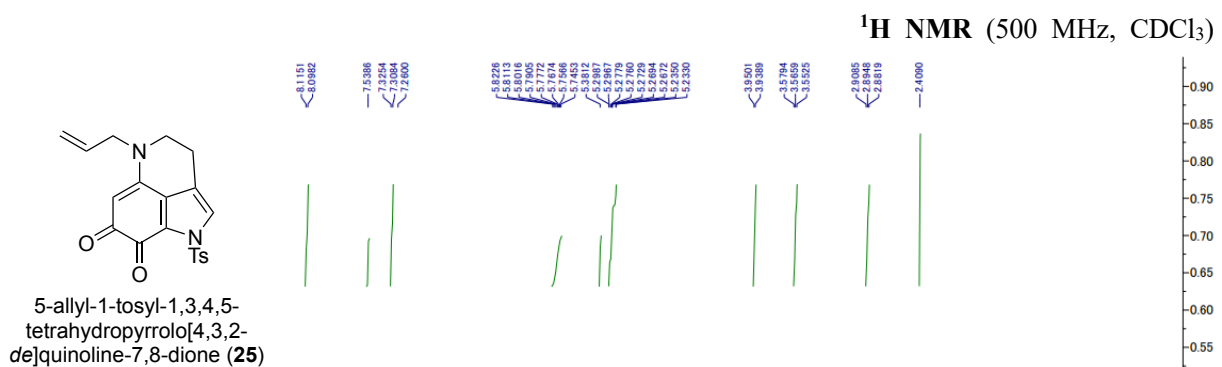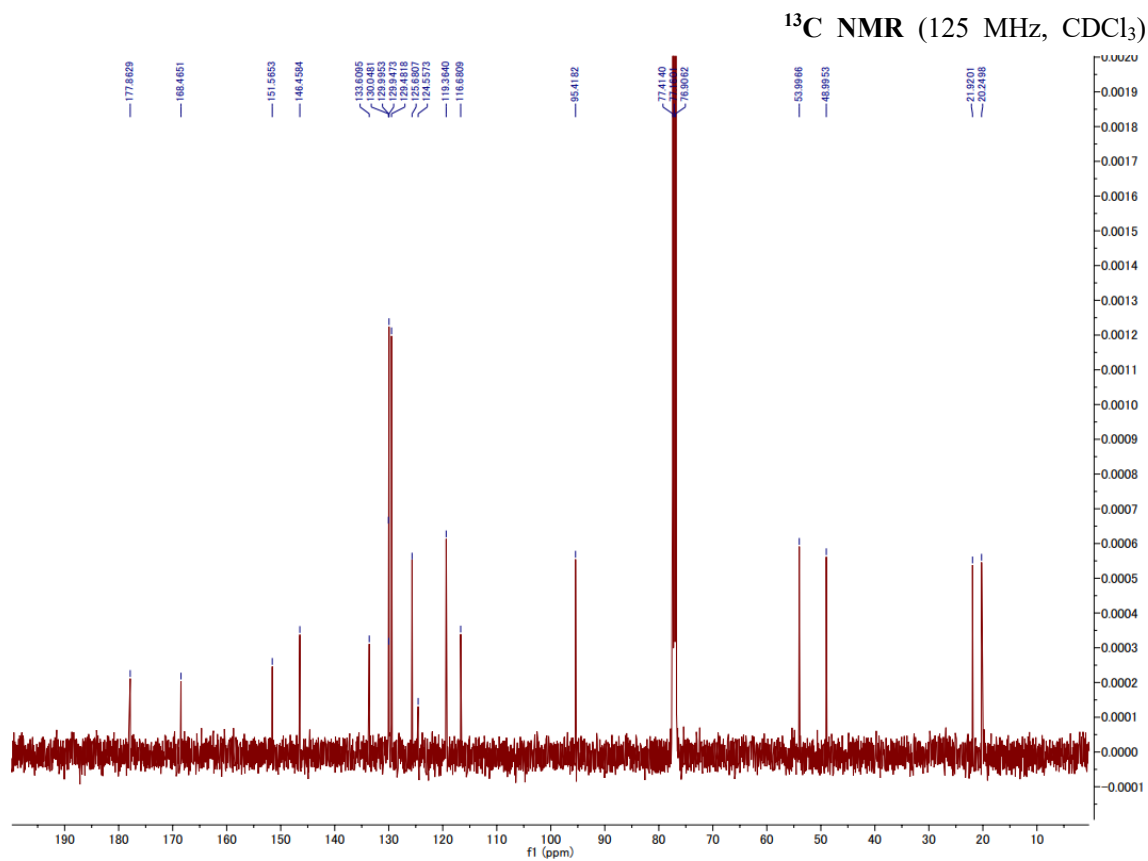



<sup>1</sup>H NMR (500 MHz, CDCl<sub>3</sub>)

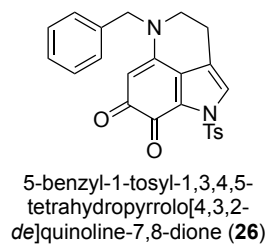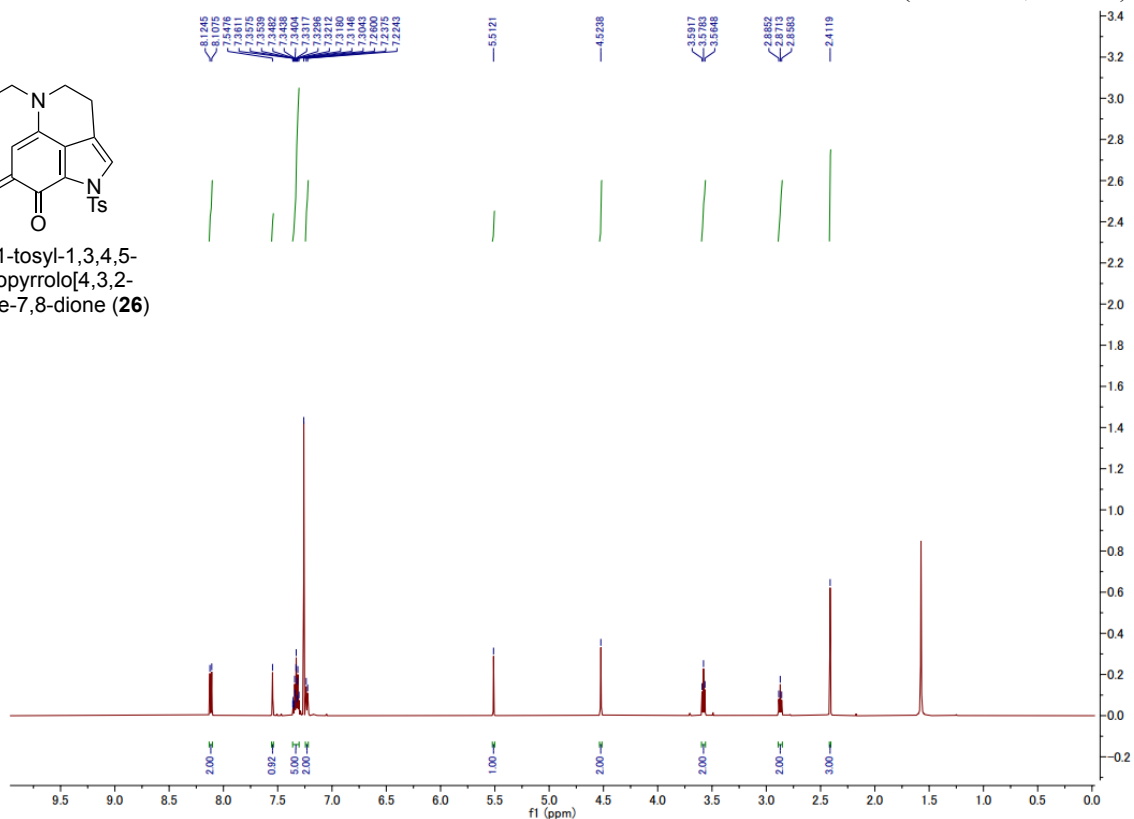

<sup>13</sup>C NMR (125 MHz, CDCl<sub>3</sub>)

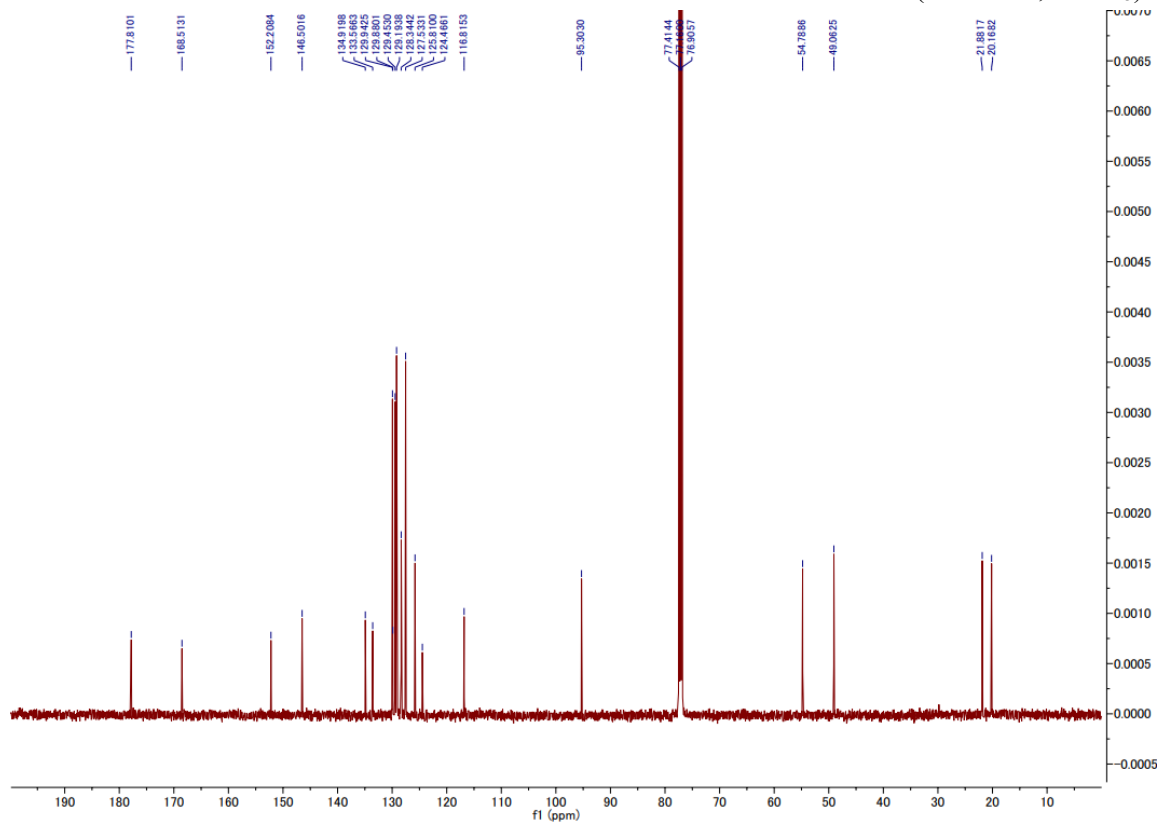

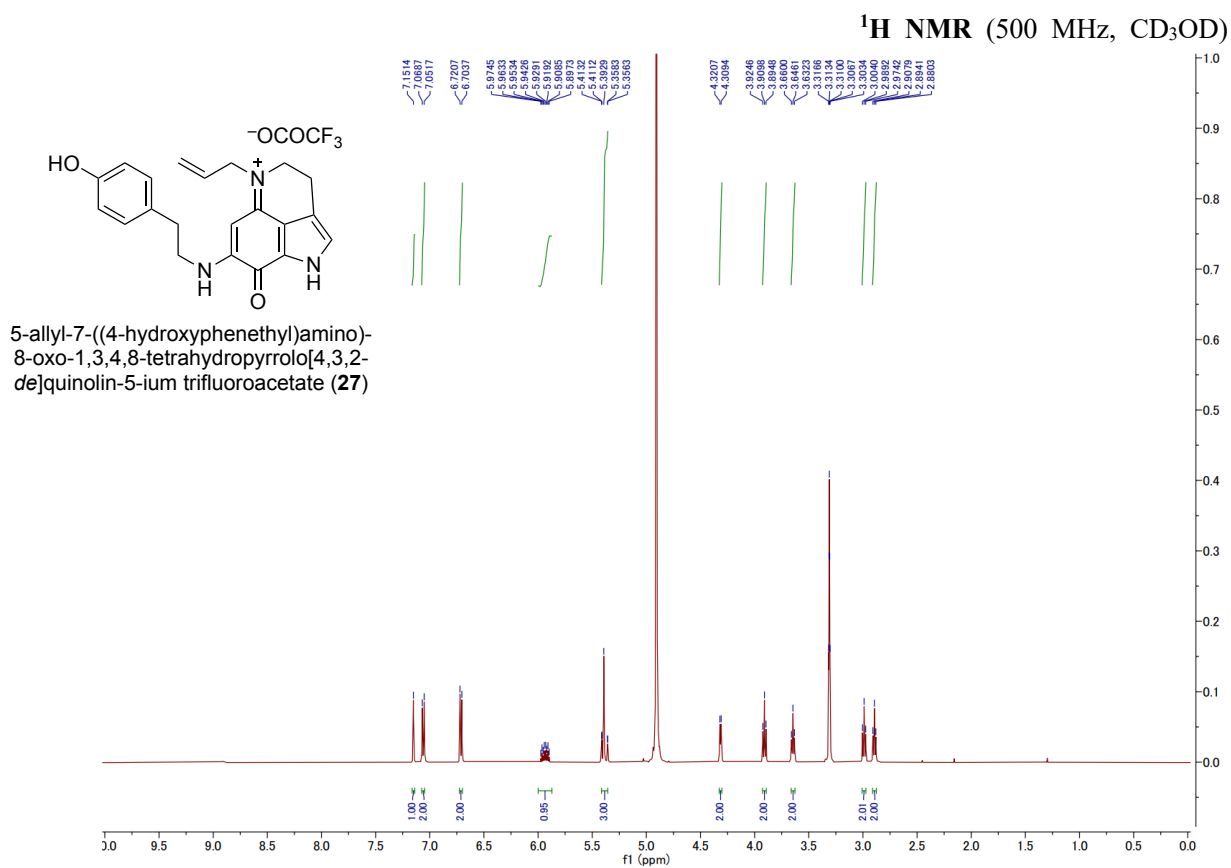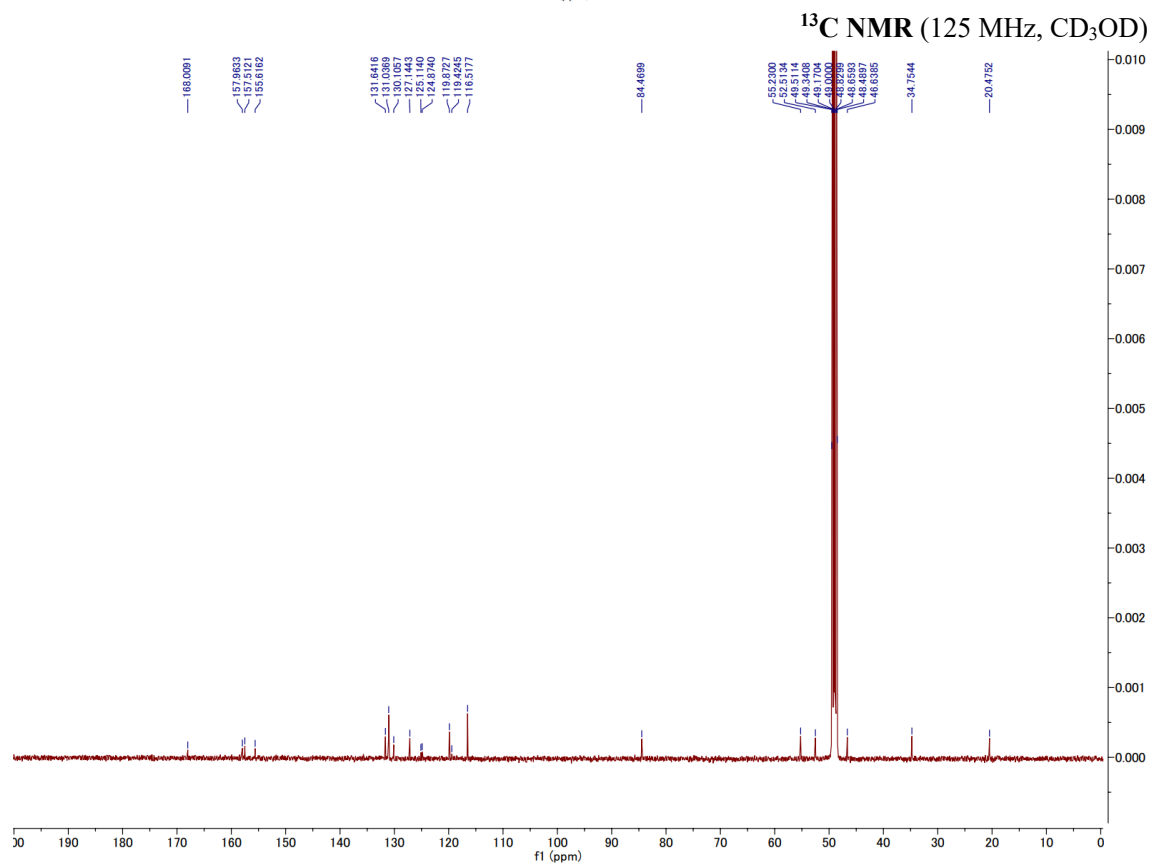

**<sup>1</sup>H NMR** (500 MHz, CD<sub>3</sub>OD)

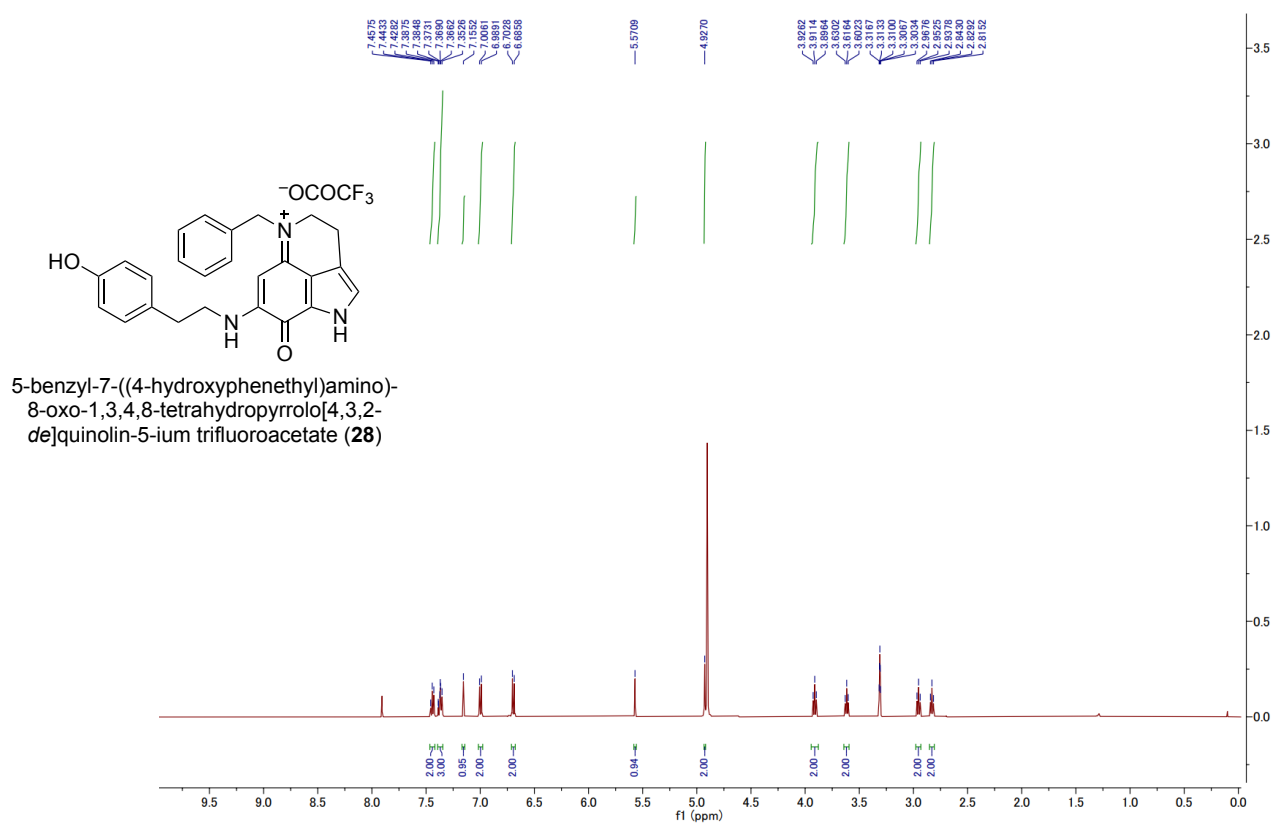<sup>13</sup>C NMR (125 MHz, CD<sub>3</sub>OD)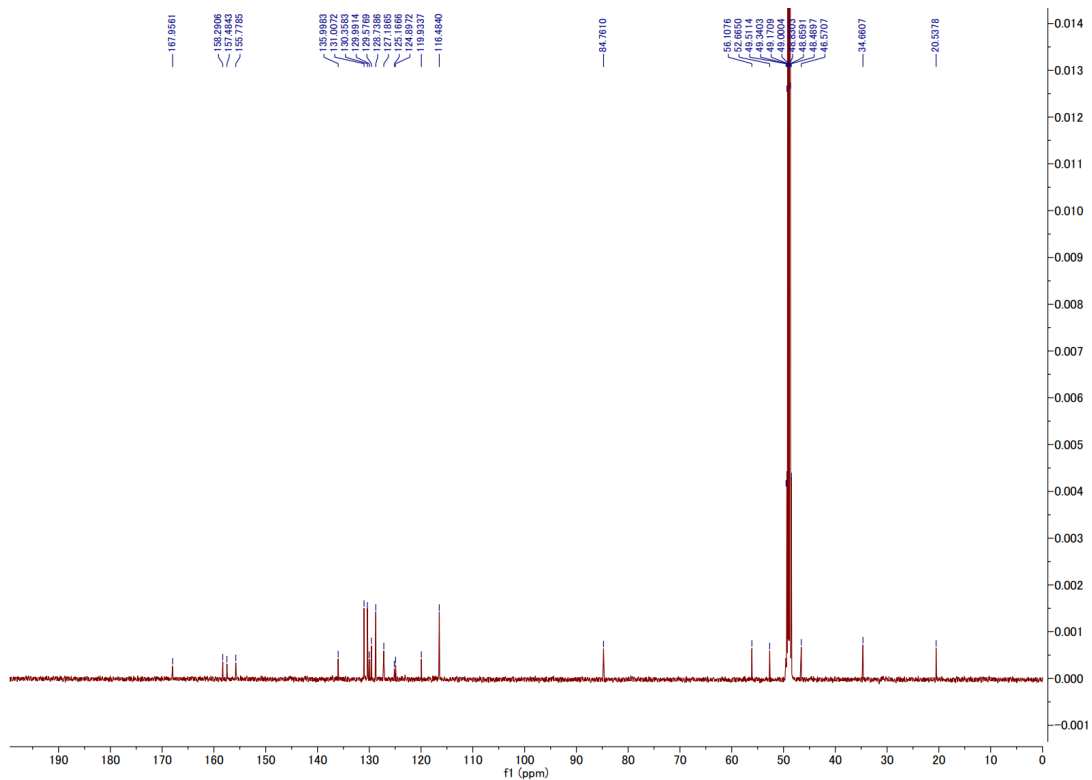

Supplement: s1 [file s1]
